# Supplementary material
Source: PubMed Central journal article supplement (PMC2636852)

# Supplementary Figure 1. Thorner et al.

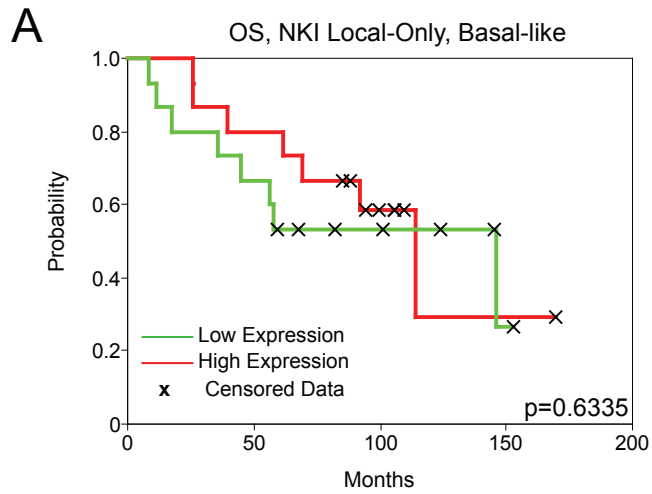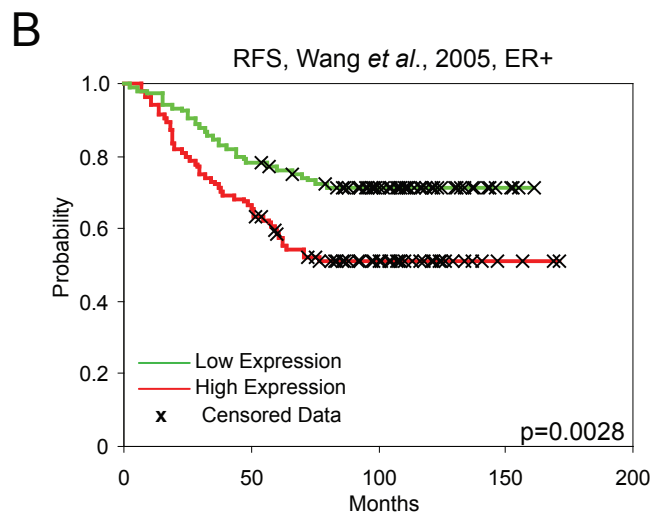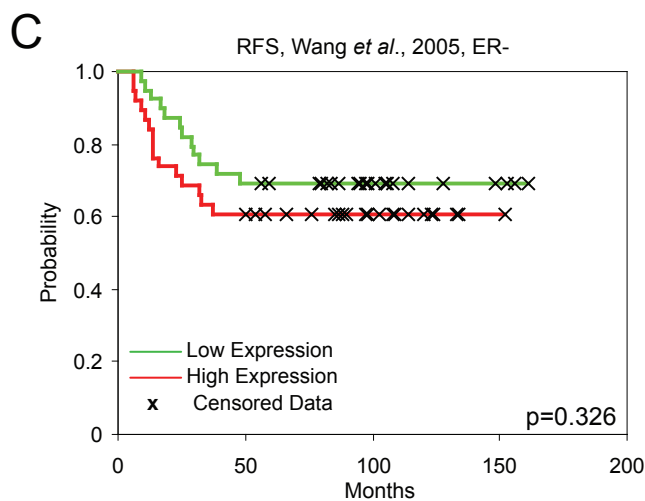

Supplement: NIHMS76747-supplement-3.pdf [file NIHMS76747-supplement-3.pdf]

Supplementary Figure 2. Thorner et al.

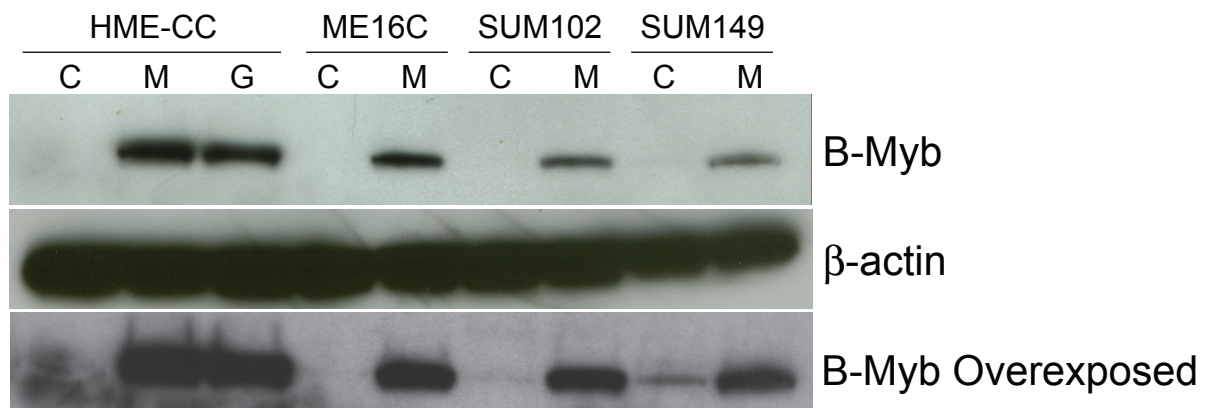

Supplement: NIHMS76747-supplement-4.pdf [file NIHMS76747-supplement-4.pdf]

# Supplementary Figure 3. Thorner et al.

A

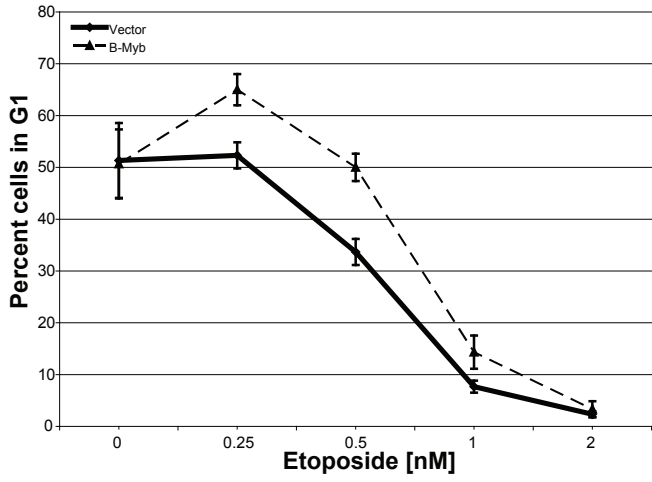

B

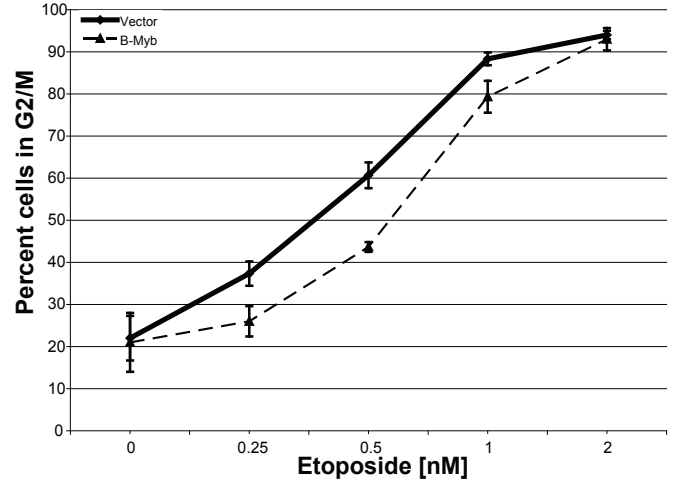

Supplement: NIHMS76747-supplement-5.pdf [file NIHMS76747-supplement-5.pdf]
